# Supplementary material
Source: PubMed Central journal article supplement (PMC5347605)
Supplement: pnas.1615056114.sapp.pdf [file pnas.1615056114.sapp.pdf]

**A signal sequence suppressor mutant that stabilizes an assembled  
state of the twin arginine translocase**

Qi Huang, Felicity Alcock, Holger Kneuper, Justin C. Deme<sup>3</sup>, Sarah Rollauer, Susan M. Lea,  
Ben C. Berks and Tracy Palmer

**SUPPORTING INFORMATION**

**SI APPENDIX**

| Clone | TatB substitution/s |
|-------|---------------------|
| BRE1  | L9Q K103R           |
| BRE2* | L9Q                 |
| BRN2  | L9Q Q134V           |
| BRN3* | L9Q                 |
| BRN4  | L10P V12M           |
| BRN5  | L9P                 |
| BRQ1* | K30I K65R N99D      |
| BRQ2* | K30I K65R N99D      |
| BRQ3* | I36N S41T           |
| BRQ4  | L9Q T72A            |
| BRQ5* | I36N S41T           |
| BRH1  | L9Q N73K            |
| BRH2  | E8K L71H            |
| BRH4  | F13Y P138L K159R    |
| BRH5* | F13Y                |
| BRH6* | F13Y                |
| BRH7* | L9Q                 |
| BRH8  | F6Y V32A A69V       |
| BRH9* | F13Y                |
| BKQ1* | F13Y                |

**Table S1.** Clones isolated from a *tatB* mutant library following screening for suppression of transport defects of inactive signal peptides. The BRE, BRN, BRQ, BRH, BHH, BKH or BKQ clone nomenclature signify substitutions isolated following screening against RE, RN or KQ variants of the AmiA signal peptide RR motif, respectively.

\*identical clones

| Clone  | TatAB substitution/s                         |
|--------|----------------------------------------------|
| AB-1   | TatA K23N, TatB I36N, TatB N119I, TatB S164C |
| AB-5   | TatB L10P                                    |
| AB-16  | TatB L10P, TatB N73Y                         |
| AB-157 | TatB F13Y                                    |
| AB-172 | TatA A60E, TatA A76R, TatB F13Y              |

**Table S2.** Clones isolated from a *tatAB* mutant library following screening for suppression of the transport defect arising from the TatC F94Q substitution.

| Strain                                                   | Relevant genotype                                                                                                                                                                                                | Source    |
|----------------------------------------------------------|------------------------------------------------------------------------------------------------------------------------------------------------------------------------------------------------------------------|-----------|
| JM109                                                    | <i>endA1, recA1, gyrA96, thi, hsdR17</i> ( <i>r<sub>k</sub><sup>-</sup></i> , <i>m<sub>k</sub><sup>+</sup></i> ), <i>relA1, supE44, Δ(lac-proAB)</i> , [F' <i>traD36, proAB, laqI<sup>q</sup>ZΔM15</i> ]         | Promega   |
| XL10-gold                                                | Tet <sup>r</sup> Δ( <i>mcrA</i> )183 Δ( <i>mcrCB-hsdSMR-mrr</i> )173 <i>endA1 supE44 thi-1 recA1 gyrA96 relA1 lac Hte</i> [F' <i>proAB lacI<sup>q</sup>ZDM15 Tn10</i> (Tet <sup>r</sup> ) Amy Cam <sup>r</sup> ] | Agilent   |
| MC4100                                                   | F-Δ <i>lacU169 araD139 rpsL150 relA1 ptsF rbs flbB5301</i>                                                                                                                                                       | (1)       |
| DADE                                                     | As MC4100, Δ <i>tatABC, ΔtatE</i>                                                                                                                                                                                | (2)       |
| DADE-P                                                   | as DADE, <i>pcnB1 zad-981::Tn10d</i> (Kan <sup>r</sup> )                                                                                                                                                         | (3)       |
| MΔBC                                                     | MC4100 Δ <i>tatBC</i>                                                                                                                                                                                            | (4)       |
| MCDSSAC Δ <i>tatABC</i>                                  | MC4100, <i>amiAΔ2-33 amiCΔ2-32, ΔtatABC::Apra</i>                                                                                                                                                                | (5)       |
| MC4100 Δ <i>amiA ΔamiC ΔtatABC</i>                       | MC4100, Δ <i>amiA, ΔamiC, ΔtatABC::Apra</i>                                                                                                                                                                      | This work |
| AyBCE                                                    | MC4100 Δ <i>tatA, attB::P<sub>tatA</sub>tatA-EAK-eyfp<sub>A206K</sub></i>                                                                                                                                        | (4)       |
| AyBCE ( <i>tatB<sub>L9Q</sub></i> )                      | As AyBCE, <i>tatB<sub>L9Q</sub></i>                                                                                                                                                                              | This work |
| AyBCE ( <i>tatB<sub>L10P</sub></i> )                     | As AyBCE, <i>tatB<sub>L10P</sub></i>                                                                                                                                                                             | This work |
| AyBCE ( <i>tatB<sub>F13Y</sub></i> )                     | As AyBCE, <i>tatB<sub>F13Y</sub></i>                                                                                                                                                                             | This work |
| AyBCE ( <i>tatB<sub>I36N</sub></i> )                     | As AyBCE, <i>tatB<sub>I36N</sub></i>                                                                                                                                                                             | This work |
| AyBCE ( <i>tatC<sub>F94Q</sub></i> )                     | As AyBCE, <i>tatC<sub>F94Q</sub></i>                                                                                                                                                                             | This work |
| AyBCE ( <i>tatB<sub>L9Q</sub> tatC<sub>F94Q</sub></i> )  | As AyBCE ( <i>tatB<sub>L9Q</sub>, tatC<sub>F94Q</sub></i> )                                                                                                                                                      | This work |
| AyBCE ( <i>tatB<sub>L10P</sub> tatC<sub>F94Q</sub></i> ) | As AyBCE ( <i>tatB<sub>L10P</sub>, tatC<sub>F94Q</sub></i> )                                                                                                                                                     | This work |
| AyBCE ( <i>tatB<sub>F13Y</sub> tatC<sub>F94Q</sub></i> ) | As AyBCE ( <i>tatB<sub>F13Y</sub>, tatC<sub>F94Q</sub></i> )                                                                                                                                                     | This work |
| AyBCE ( <i>tatB<sub>I36N</sub> tatC<sub>F94Q</sub></i> ) | As AyBCE ( <i>tatB<sub>I36N</sub>, tatC<sub>F94Q</sub></i> )                                                                                                                                                     | This work |
| BL21(DE3) Δ <i>tatABC</i>                                | BL21(DE3), Δ <i>tatABC::Apra</i>                                                                                                                                                                                 | This work |
| BW25113                                                  | <i>lacI<sup>q</sup> rrnB<sub>T14</sub> ΔlacZ<sub>WJ16</sub> hsdR514 ΔaraBAD<sub>AH33</sub> ΔrhaBA<sub>LD78</sub></i>                                                                                             | (6)       |
| BW25113 Δ <i>glpF ΔtatABC</i>                            | BW25113, Δ <i>glpF, ΔtatABC::Apra</i>                                                                                                                                                                            | This work |

**Table S3.** Strains used and constructed in this study.

| Plasmid              | Relevant genotype                                                                                     | Source    |
|----------------------|-------------------------------------------------------------------------------------------------------|-----------|
| pTAT101              | Low copy number vector expressing TatABC under the control of <i>tat</i> promoter. Kan <sup>r</sup> . | (7)       |
| pTH19kr              | Low copy-number cloning vector. Backbone of pTAT101.                                                  | (8)       |
| pTAT101-BF6Y         | As pTAT101, TatB F6Y exchange                                                                         | This work |
| pTAT101-BE8K         | As pTAT101, TatB E8K exchange                                                                         | This work |
| pTAT101-BL9P         | As pTAT101, TatB L9P exchange                                                                         | This work |
| pTAT101-BL9Q         | As pTAT101, TatB L9Q exchange                                                                         | This work |
| pTAT101-BL10P        | As pTAT101, TatB L10P exchange                                                                        | This work |
| pTAT101-BF13Y        | As pTAT101, TatB F13Y exchange                                                                        | This work |
| pTAT101-BK30I        | As pTAT101, TatB K30I exchange                                                                        | This work |
| pTAT101-BI36N        | As pTAT101, TatB I36N exchange                                                                        | This work |
| pTAT101-CF94Q        | As pTAT101, TatC F94Q exchange                                                                        | This work |
| pTAT101-CF94A        | As pTAT101, TatC F94A exchange                                                                        | This work |
| pTAT101-CF94D        | As pTAT101, TatC F94D exchange                                                                        | This work |
| pTAT101-CF94G        | As pTAT101, TatC F94G exchange                                                                        | This work |
| pTAT101-CF94K        | As pTAT101, TatC F94K exchange                                                                        | This work |
| pTAT101-CF94P        | As pTAT101, TatC F94P exchange                                                                        | This work |
| pTAT101-CF94R        | As pTAT101, TatC F94R exchange                                                                        | This work |
| pTAT101-CF94S        | As pTAT101, TatC F94S exchange                                                                        | This work |
| pTAT101-CF94Q-BF6Y   | As pTAT101-CF94Q, TatB F6Y exchange                                                                   | This work |
| pTAT101-CF94Q-BE8K   | As pTAT101-CF94Q, TatB E8K exchange                                                                   | This work |
| pTAT101-CF94Q-BL9P   | As pTAT101-CF94Q, TatB L9P exchange                                                                   | This work |
| pTAT101-CF94Q-BL9Q   | As pTAT101-CF94Q, TatB L9Q exchange                                                                   | This work |
| pTAT101-CF94Q-BL10P  | As pTAT101-CF94Q, TatB L10P exchange                                                                  | This work |
| pTAT101-CF94Q-BF13Y  | As pTAT101-CF94Q, TatB F13Y exchange                                                                  | This work |
| pTAT101-CF94Q-BK30I  | As pTAT101-CF94Q, TatB K30I exchange                                                                  | This work |
| pTAT101-CF94Q-BI36N  | As pTAT101-CF94Q, TatB I36N exchange                                                                  | This work |
| pTAT101-BL9Q F13Y    | As pTAT101, TatB L9Q, F13Y exchange                                                                   | This work |
| pTAT101-BL10P F13Y   | As pTAT101, TatB L10P, F13Y exchange                                                                  | This work |
| pTAT101-BL9Q I36N    | As pTAT101, TatB L9Q, I36N exchange                                                                   | This work |
| pTAT101-BL10P I36N   | As pTAT101, TatB L10P, I36N exchange                                                                  | This work |
| pTAT101-CE103A       | As pTAT101, TatC E103A exchange                                                                       | This work |
| pTAT101-CE103A-BL9Q  | As pTAT101-CE103A, TatB L9Q exchange                                                                  | This work |
| pTAT101-CE103A-BL10P | As pTAT101-CE103A, TatB L10P exchange                                                                 | This work |
| pTAT101-CE103A-BF13Y | As pTAT101-CE103A, TatB F13Y exchange                                                                 | This work |
| pTAT101-CE103A-BI36N | As pTAT101-CE103A, TatB I36N exchange                                                                 | This work |
| pTAT101-CE103K       | As pTAT101, TatC E103K exchange                                                                       | (7)       |
| pTAT101-CE103K-BL9Q  | As pTAT101-CE103K, TatB L9Q exchange                                                                  | This work |
| pTAT101-CE103K-BL10P | As pTAT101-CE103K, TatB L10P exchange                                                                 | This work |

|                                    |                                                                  |           |
|------------------------------------|------------------------------------------------------------------|-----------|
| pTAT101-CE103K-BF13Y               | As pTAT101-CE103A, TatB F13Y exchange                            | This work |
| pTAT101-CE103K-BI36N               | As pTAT101-CE103A, TatB I36N exchange                            | This work |
| pTAT101-CP48L                      | As pTAT101, TatC P48L exchange                                   | (9)       |
| pTAT101-CP48L- BL9Q                | As pTAT101-CP48L, TatB L9Q exchange                              | This work |
| pTAT101-CP48L - BL10P              | As pTAT101-CP48L, TatB L10P exchange                             | This work |
| pTAT101-CP48L - BF13Y              | As pTAT101-CP48L, TatB F13Y exchange                             | This work |
| pTAT101-CM59K                      | As pTAT101, TatC M59K exchange                                   | (9)       |
| pTAT101-CM59K-BL9Q                 | As pTAT101-CM59K, TatB L9Q exchange                              | This work |
| pTAT101-CM59K - BL10P              | As pTAT101-CM59K, TatB L10P exchange                             | This work |
| pTAT101-CM59K - BF13Y              | As pTAT101-CM59K, TatB F13Y exchange                             | This work |
| pTAT101-CV145E                     | As pTAT101, TatC V145E exchange                                  | (9)       |
| pTAT101-CV145E-BL9Q                | As pTAT101-CV145E, TatB L9Q exchange                             | This work |
| pTAT101-CV145E - BL10P             | As pTAT101-CV145E, TatB L10P exchange                            | This work |
| pTAT101-CV145E - BF13Y             | As pTAT101-CV145E, TatB F13Y exchange                            | This work |
| pTAT101-CD211K                     | As pTAT101, TatC D211K exchange                                  | This work |
| pTAT101-CD211K-BL9Q                | As pTAT101-CD211K, TatB L9Q exchange                             | This work |
| pTAT101-CD211K - BL10P             | As pTAT101-CD211K, TatB L10P exchange                            | This work |
| pTAT101-CD211K - BF13Y             | As pTAT101-CD211K, TatB F13Y exchange                            | This work |
| pTAT101-CQ215K                     | As pTAT101, TatC Q215K exchange                                  | This work |
| pTAT101-CQ215K-BL9Q                | As pTAT101-CQ215K, TatB L9Q exchange                             | This work |
| pTAT101-CQ215K - BL10P             | As pTAT101-CQ215K, TatB L10P exchange                            | This work |
| pTAT101-CQ215K - BF13Y             | As pTAT101-CQ215K, TatB F13Y exchange                            | This work |
| pTAT101 cys less                   | As pTAT101, All 4 cys codons in <i>tatC</i> substituted with ala | (9)       |
| pTAT101 cys less CM205C            | As pTAT101 cys less, TatC M205C exchange                         | (9)       |
| pTAT101 cys less BL9Q CM205C       | As pTAT101 cys less CM205C, TatB L9Q exchange                    | This work |
| pTAT101 cys less BL10P CM205C      | As pTAT101 cys less CM205C, TatB L10P exchange                   | This work |
| pTAT101 cys less BF13Y CM205C      | As pTAT101 cys less CM205C, TatB F13Y exchange                   | This work |
| pTAT101 cys less BI36N CM205C      | As pTAT101 cys less CM205C, TatB I36N exchange                   | This work |
| pTAT101 cys less CF94Q M205C       | As pTAT101 cys less CM205C, TatC F94Q                            | This work |
| pTAT101 cys less BL10P CF94Q M205C | As pTAT101 cys less CF94Q M205C, TatB L10P                       | This work |

|                                       |                                                                                                          |           |
|---------------------------------------|----------------------------------------------------------------------------------------------------------|-----------|
| pTAT101 cys less<br>BF13Y CF94Q M205C | As pTAT101 cys less CF94Q M205C, TatB F13Y                                                               | This work |
| pQE80-CueO                            | As pQE80, carrying <i>cueO<sub>his</sub></i>                                                             | (4)       |
| pQE80-CueO <sup>KK</sup> h            | As pQE80-CueO, CueO R3K, R4K exchange                                                                    | (4)       |
| pTAT1d                                | Medium copy number vector expressing TatABC under the control of <i>tat</i> promoter. Amp <sup>r</sup> . | (10)      |
| pUNIPROM                              | pT7.5 vector carrying a <i>tat</i> promoter. Backbone of pTAT1d                                          | (11)      |
| pTAT1d-CF94Q                          | As pTAT1d, TatC F94Q exchange                                                                            | This work |
| pTAT1d-CF94A                          | As pTAT1d, TatC F94A exchange                                                                            | This work |
| pTAT1d-CF94D                          | As pTAT1d, TatC F94D exchange                                                                            | This work |
| pTAT1d-CF94G                          | As pTAT1d, TatC F94G exchange                                                                            | This work |
| pTAT1d-CF94K                          | As pTAT1d, TatC F94K exchange                                                                            | This work |
| pTAT1d-CF94P                          | As pTAT1d, TatC F94P exchange                                                                            | This work |
| pTAT1d-CF94R                          | As pTAT1d, TatC F94R exchange                                                                            | This work |
| pTAT1d-CF94S                          | As pTAT1d, TatC F94S exchange                                                                            | This work |
| pTAT1d-CF94Q-BL9Q                     | As pTAT1d-CF94Q, TatB L9Q exchange                                                                       | This work |
| pTAT1d-CF94Q-BL10P                    | As pTAT1d-CF94Q, TatB L10P exchange                                                                      | This work |
| pTAT1d-CF94Q-BF13Y                    | As pTAT1d-CF94Q, TatB F13Y exchange                                                                      | This work |
| pTAT1d-CF94Q-BI36N                    | As pTAT1d-CF94Q, TatB I36N exchange                                                                      | This work |
| pTATBC1d                              | pUNIPROM carrying <i>tatBC</i>                                                                           | This work |
| pSUAmiA                               | pSU18 carrying <i>amiA</i>                                                                               | (12)      |
| pSUAmiA-RD                            | As pSUAmiA, R14D exchange                                                                                | This work |
| pSUAmiA-RE                            | As pSUAmiA, R14E exchange                                                                                | This work |
| pSUAmiA-RH                            | As pSUAmiA, R14H exchange                                                                                | This work |
| pSUAmiA-RN                            | As pSUAmiA, R14N exchange                                                                                | This work |
| pSUAmiA-RQ                            | As pSUAmiA, R14Q exchange                                                                                | This work |
| pSUAmiA-KH                            | As pSUAmiA, R13K, R14H exchange                                                                          | This work |
| pSUAmiA-KQ                            | As pSUAmiA, R13K, R14Q exchange                                                                          | This work |
| pSUAmiA-HH                            | As pSUAmiA, R13H, R14H exchange                                                                          | This work |
| pSUSufI <sup>ss</sup> -mAmiA          | pSU18, carrying SufI <sup>ss</sup> -mAmiA                                                                | This work |
| pSUSufI <sup>ss</sup> -mAmiA-RD       | As pSUSufI <sup>ss</sup> -mAmiA, SufI R6D exchange                                                       | This work |
| pSUSufI <sup>ss</sup> -mAmiA-RE       | As pSUSufI <sup>ss</sup> -mAmiA, SufI R6E exchange                                                       | This work |
| pSUSufI <sup>ss</sup> -mAmiA-RH       | As pSUSufI <sup>ss</sup> -mAmiA, SufI R6H exchange                                                       | This work |
| pSUSufI <sup>ss</sup> -mAmiA-RN       | As pSUSufI <sup>ss</sup> -mAmiA, SufI R6N exchange                                                       | This work |
| pSUSufI <sup>ss</sup> -mAmiA-RQ       | As pSUSufI <sup>ss</sup> -mAmiA, SufI R6Q exchange                                                       | This work |
| pSUSufI <sup>ss</sup> -mAmiA-KH       | As pSUSufI <sup>ss</sup> -mAmiA, SufI R5K, R6H exchange                                                  | This work |
| pSUSufI <sup>ss</sup> -mAmiA-KQ       | As pSUSufI <sup>ss</sup> -mAmiA, SufI R5K, R6Q exchange                                                  | This work |
| pSUSufI <sup>ss</sup> -mAmiA-KK       | As pSUSufI <sup>ss</sup> -mAmiA, SufI R5K, R6K exchange                                                  | This work |
| pSUSufI <sup>ss</sup> -mAmiA-HH       | As pSUSufI <sup>ss</sup> -mAmiA, SufI R5H, R6H exchange                                                  | This work |
| pSUSufI <sup>ss</sup> noH-mAmiA       | As pSUSufI <sup>ss</sup> -mAmiA, <i>sufI</i> Δ11-21                                                      | This work |
| pSUmAmiA                              | As pSUAmiA, <i>amiA</i> Δ2-34                                                                            | This work |
| pFAT75ΔA-BC                           | As pQEABC, but with <i>tatA</i> gene in frame deleted                                                    | (13)      |
| pFAT75ΔA-BC<br>BE8K                   | As pFAT75ΔA-BC, TatB E8K exchange                                                                        | This work |
| pFAT75ΔA-BC<br>BF13Y                  | As pFAT75ΔA-BC, TatB F13Y exchange                                                                       | This work |
| pFAT75ΔA-BC<br>BI36N                  | As pFAT75ΔA-BC, TatB BI36N exchange                                                                      | This work |
| pFAT75ΔA-BC                           | As pFAT75ΔA-BC, TatC F94Q exchange                                                                       | This work |



|                                           |                                                                                        |           |
|-------------------------------------------|----------------------------------------------------------------------------------------|-----------|
| CF94Q                                     |                                                                                        |           |
| pFAT75ΔA-BC<br>BL9Q CF94Q                 | As pFAT75ΔA-BC CF94Q, TatB L9Q exchange                                                | This work |
| pFAT75ΔA-BC<br>BL10P CF94Q                | As pFAT75ΔA-BC CF94Q, TatB L10P exchange                                               | This work |
| pFAT75ΔA-BC<br>BF13Y CF94Q                | As pFAT75ΔA-BC CF94Q, TatB F13Y exchange                                               | This work |
| pFAT75ΔA-BC<br>BI36NC CF94Q               | As pFAT75ΔA-BC CF94Q, TatB I36N exchange                                               | This work |
| pFAT75ΔA-BC-AmiAhis                       | As pFAT75ΔA-BC also producing C-terminally his-tagged AmiA                             | This work |
| pFAT75ΔA-BC-<br>AmiARDhis                 | As pFAT75ΔA-BC-AmiAhis, AmiA R14D exchange                                             | This work |
| pFAT75ΔA-BC-<br>AmiARNhis                 | As pFAT75ΔA-BC-AmiAhis, AmiA R14N exchange                                             | This work |
| pFAT75ΔA-BC-<br>AmiAKKhis                 | As pFAT75ΔA-BC-AmiAhis, AmiA R13K, R14K exchange                                       | This work |
| pFAT75ΔA-BC-<br>AmiAKQhis                 | As pFAT75ΔA-BC-AmiAhis, AmiA R13K, R14Q exchange                                       | This work |
| pFAT75ΔA-BF13YC-<br>AmiAhis               | As pFAT75ΔA-BC, TatBF13Y exchange                                                      | This work |
| pFAT75ΔA-BF13YC-<br>AmiARDhis             | As pFAT75ΔA-BF13YC-AmiAhis, AmiA R14D exchange                                         | This work |
| pFAT75ΔA-BF13YC-<br>AmiARNhis             | As pFAT75ΔA-BF13YC-AmiAhis, AmiA R14N exchange                                         | This work |
| pFAT75ΔA-BF13YC-<br>AmiAKKhis             | As pFAT75ΔA-BF13YC-AmiAhis, AmiA R13K, R14K exchange                                   | This work |
| pFAT75ΔA-BF13YC-<br>AmiAKQhis             | As pFAT75ΔA-BF13YC-AmiAhis, AmiA R13K, R14Q exchange                                   | This work |
| pFAT75ΔA-BC-<br>mAmiAhis                  | As pFAT75ΔA-BC also producing C-terminally his-tagged mature AmiA                      | This work |
| pFAT75ΔA-BF13YC-<br>mAmiAhis              | As pFAT75ΔA-BC-mAmiAhis, TatBF13Y exchange                                             | This work |
| pQE70-mAmiA                               | pQE70 producing C-terminally his-tagged mature AmiA                                    | This work |
| pQE70-mAmiC                               | pQE70 producing C-terminally his-tagged mature AmiC                                    | This work |
| pSufI <sub>ss</sub> -GFP <sub>his</sub>   | As pCDFDuet-1, carrying synthetic SufI signal sequence-fused GFP <sub>his</sub>        | This work |
| pSufI <sub>ss</sub> RD-GFP <sub>his</sub> | As pSufI <sub>ss</sub> -GFP <sub>his</sub> , SufI R6D exchange                         | This work |
| pSufI <sub>ss</sub> RN-GFP <sub>his</sub> | As pSufI <sub>ss</sub> -GFP <sub>his</sub> , SufI R6N exchange                         | This work |
| pSufI <sub>ss</sub> KK-GFP <sub>his</sub> | As pSufI <sub>ss</sub> -GFP <sub>his</sub> , SufI R5K, R6K exchange                    | This work |
| pQE80 sufI <sub>his</sub>                 | pQE80 carrying <i>sufI<sub>his</sub></i>                                               | This work |
| pQE80 RDsufI <sub>his</sub>               | pQE80 sufI <sub>his</sub> SufI R6D exchange                                            | This work |
| pQE80 RNsufI <sub>his</sub>               | pQE80 sufI <sub>his</sub> SufI R6N exchange                                            | This work |
| pQE80 KQsufI <sub>his</sub>               | pQE80 sufI <sub>his</sub> SufI R5K, R6Q exchange                                       | This work |
| pMAK705                                   | Cloning vector with a temperature-sensitive replicon                                   | (14)      |
| pMAK-AupBC                                | As pMAK705, carrying 500 bp upstream sequence of <i>tatA</i> and <i>tatBC</i> sequence | This work |
| pMAK-AupBC-BL9Q                           | As pMAK-AupBC, TatB L9Q exchange                                                       | This work |
| pMAK-AupBC-BL10P                          | As pMAK-AupBC, TatB L10P exchange                                                      | This work |
| pMAK-AupBC-BF13Y                          | As pMAK-AupBC, TatB F13Y exchange                                                      | This work |

|                              |                                                                                                     |               |
|------------------------------|-----------------------------------------------------------------------------------------------------|---------------|
| pMAK-AupBC-BI36N             | As pMAK-AupBC, TatB I36N exchange                                                                   | This work     |
| pMAK-AupBC-CF94Q             | As pMAK-AupBC, TatC F94Q exchange                                                                   | This work     |
| pMAK-AupBC- BL9Q<br>CF94Q    | As pMAK-AupBC, TatB L9Q, TatC F94Q<br>exchange                                                      | This work     |
| pMAK-AupBC- BL10P<br>CF94Q   | As pMAK-AupBC, TatB L10P, TatC F94Q<br>exchange                                                     | This work     |
| pMAK-AupBC- BF13Y<br>CF94Q   | As pMAK-AupBC, TatB F13Y, TatC F94Q<br>exchange                                                     | This work     |
| pMAK-AupBC- BI36N<br>CF94Q   | As pMAK-AupBC, TatB I36N, TatC F94Q<br>exchange                                                     | This work     |
| pBAD24                       | Arabinose-inducible protein expression vector                                                       | (15)          |
| pBADTatABChis                | As pBAD24, carrying <i>tatABC</i> his                                                               | This work     |
| pBADTatABChis-BL9Q           | As pBADTatABChis, TatB L9Q exchange                                                                 | This work     |
| pBADTatABChis-BL10P          | As pBADTatABChis, TatB L10P exchange                                                                | This work     |
| pBADTatABChis-<br>BF13Y      | As pBADTatABChis, TatB F13Y exchange                                                                | This work     |
| pBADTatABChis-BI36N          | As pBADTatABChis, TatB I36N exchange                                                                | This work     |
| pBAD22SecY( $\Delta$ plug)EG | pBAD22, producing SecY( $\Delta$ codons62-72)EG                                                     | Ian Collinson |
| p101C*TatBC                  | Low copy vector for expression of <i>tatBC</i> from the<br><i>tatA</i> promoter with a modified RBS | (4)           |
| p101C*BCflag                 | p101C*BC derivative producing TatB and C-<br>terminally flag-tagged TatC                            | This work     |
| p101C*BCflag E8K             | As p101C*BCflag, TatB E8K exchange                                                                  | This work     |
| p101C*BCflag F13Y            | As p101C*BCflag, TatB F13Y exchange                                                                 | This work     |

**Table S4.** Plasmids used and constructed in this study

| Primer name    | Sequence (5'-3')                                             |
|----------------|--------------------------------------------------------------|
| AmiARDf        | CTCACTTCGCGCGACCAGGTGCTG                                     |
| AmiARDr        | CAGCACCTGGTCGCGCGAAGTGAG                                     |
| AmiAREf        | CTCACTTCGCGCGAACAGGTGCTG                                     |
| AmiAREr        | CAGCACCTGTTTCGCGCGAAGTGAG                                    |
| AmiARNf        | CTCACTTCGCGCAACCAGGTGCTG                                     |
| AmiARNr        | CAGCACCTGGTTGCGCGAAGTGAG                                     |
| AmiARQf        | CTCACTTCGCGCCAACAGGTGCTG                                     |
| AmiARQr        | CAGCACCTGTTGGCGCGAAGTGAG                                     |
| AmiARHf        | CTCACTTCGCGCCACCAGGTGCTG                                     |
| AmiARHr        | CAGCACCTGGTGGCGCGAAGTGAG                                     |
| AmiAHHf        | CTCACTTCGCACCACCAGGTGCTG                                     |
| AmiAHHr        | CAGCACCTGGTGGTGGCAAGTGAG                                     |
| AmiAKHf        | CTCACTTCGAAACACCAGGTGCTG                                     |
| AmiAKHr        | CAGCACCTGGTGTTCGAAGTGAG                                      |
| AmiAKQf        | CTCACTTCGAAACAACAGGTGCTG                                     |
| sufIssFE       | CCGGAATTCTTTTACATGGAGCAAATATG                                |
| sufIssR        | GTTCTGCTTTTTGCGCTGGCCTTCAGGG                                 |
| amiA-mF        | GGCCAGCGCAAAGACGAACTTTTAAAAACC                               |
| amiA-mRX       | GACTCTAGATTATCGCTT TTTC                                      |
| AmiAKQr        | CAGCACCTGTTGTTTCGAAGTGAG                                     |
| SufIss-RDf     | GTCACTCAGTCGGGATCAGTTCATTCAGGC                               |
| SufIss-RDr     | GCCTGAATGAACTGATCCCGACTGAGTGAC                               |
| SufIss-RHf     | GTCACTCAGTCGGCATCAGTTCATTCAGGC                               |
| SufIss-RHr     | GCCTGAATGAACTGATGCCGACTGAGTGAC                               |
| SufIss-RNf     | GTCACTCAGTCGGAACCAGTTCATTCAGGC                               |
| SufIss-RNr     | GCCTGAATGAACTGGTTCCGACTGAGTGAC                               |
| SufIss-RQf     | GTCACTCAGTCGGCAGCAGTTCATTCAGGC                               |
| SufIss-RQr     | GCCTGAATGAACTGCTGCCGACTGAGTGAC                               |
| SufIss-RKf     | GTCACTCAGTCGGAAACAGTTCATTCAGGC                               |
| SufIss-RKr     | GCCTGAATGAACTGTTTCCGACTGAGTGAC                               |
| SufIss-KHf     | GTCACTCAGTAAACATCAGTTCATTCAGGC                               |
| SufIss-KHr     | GCCTGAATGAACTGATGTTTACTGAGTGAC                               |
| SufIss-KQf     | GTCACTCAGTAAACAGCAGTTCATTCAGGC                               |
| SufIss-KQr     | GCCTGAATGAACTGCTGTTTACTGAGTGAC                               |
| SufIss-KKf     | GTCACTCAGTAAAAACAGTTCATTCAGGC                                |
| SufIss-KKr     | GCCTGAATGAACTGTTTTTACTGAGTGAC                                |
| SufIss-HHf     | GTCACTCAGTCATCATCAGTTCATTCAGGC                               |
| SufIss-HHr     | GCCTGAATGAACTGATGATGACTGAGTGAC                               |
| SufI-noHF      | CGGCGTCAGTTCATTCAGCCCCTGAAGGCCAGCGCA                         |
| SufI-noHR      | TGCGCTGGCCTTCAGGGGCTGAATGAACTGACGCCG                         |
| AmiA-nossFE    | CCGGAATTCTATTACAACACTCAGGCCGTATGAAAGACGAACTTTT<br>AAAAACCAG  |
| AmiAFATApal-F  | GCGCGGGCCCATTAAGAGGAGAAATTAACCATGAGCACTTTT<br>AAACCACTAAAAAC |
| mAmiAFATApal-F | GCGCGGGCCCATTAAGAGGAGAAATTAACCATGAAAGACGAA<br>CTTTTAAAAACCAG |

|                   |                                   |
|-------------------|-----------------------------------|
| mAmiA-SphI-F      | GCGCGCATGCGAAAAGACGAACTTTTAAAAACC |
| AmiAnostopBamHI-R | CGCGGATCCTCGCTTTTTTCGAATGTGCTTTC  |
| mAmiC-SphI-F      | GCGCGCATGCGAGCGGTCAGCCAGGTCGTG    |
| AmiCnstopBamHI-R  | CGCGGATCCTCCCCTTCTCGCCAGCGTC      |
| C-F94S1           | GGTGTGGGCATCTATCGCCCCAG           |
| C-F94S2           | CTGGGGCGATAGATGCCACACC            |
| C-F94A1           | GGTGTGGGCAGCGATCGCCCCAG           |
| C-F94A2           | CTGGGGCGATCGCTGCCACACC            |
| C-F94K1           | GGTGTGGGCAAAAATCGCCCCAG           |
| C-F94K2           | CTGGGGCGATTTTTGCCCACACC           |
| C-F94Q1           | GGTGTGGGCACAGATCGCCCCAG           |
| C-F94Q2           | CTGGGGCGATCTGTGCCACACC            |
| C-F94R1           | GGTGTGGGCACGCATCGCCCCAG           |
| C-F94R2           | CTGGGGCGATGCGTGCCCACACC           |
| C-F94P1           | GGTGTGGGCACCGATCGCCCCAG           |
| C-F94P2           | CTGGGGCGATCGGTGCCACACC            |
| C-F94D1           | GGTGTGGGCAGATATCGCCCCAG           |
| C-F94D2           | CTGGGGCGATATCTGCCACACC            |
| C-F94G1           | GGTGTGGGCAGGCATCGCCCCAG           |
| C-F94G2           | CTGGGGCGATGCCTGCCACACC            |
| C-F94C1           | GGTGTGGGCATGCATCGCCCCAG           |
| C-F94C2           | CTGGGGCGATGCATGCCACACC            |
| B-F6Yf            | GTTTGATATCGGTTATAGCGAACTGC        |
| B-F6Yr            | GCAGTTCGCTATAACCGATATCAAAC        |
| B-L9Qf            | GGTTTTAGCGAACAGCTATTGGTG          |
| B-L9Qr            | CACCAATAGCTGTTGCTAAAACC           |
| B-L9Pf            | GGTTTTAGCGAACCGCTATTGGTG          |
| B-L9Pr            | CACCAATAGCGGTTGCTAAAACC           |
| B-L10Pf           | GCGAACTGCCATTGGTGTTTCATC          |
| B-L10Pr           | GATGAACACCAATGGCAGTTCGC           |
| B-F13Yf           | GCTATTGGTGTACATCATCGGCC           |
| B-F13Yr           | GGCCGATGATGTACACCAATAGC           |
| B-K30lf           | GTGGCGGTAATTACGGTAGCGG            |
| B-K30lr           | CCGCTACCGTAATTACCGCCAC            |
| B-I36Nf           | GTAGCGGGCTGGAATCGCGGTTGC          |
| B-I36Nr           | GCAACGCGCGATTCCAGCCCGCTAC         |
| tatB E8K 1        | GATATCGGTTTTAGCAAACCTGCTATTGG     |
| tatB E8K 2        | CCAATAGCAGTTTGCTAAAACCGATATC      |
| C-E103A1          | CGCTGTATAAGCATGCGCGTCGCCTGGTGGTGC |
| C-E103A2          | GCACCACCAGGCGACGCGCATGCTTATACAGCG |
| C-P48L1           | GGTATCCGCGCTGTTGATCAAGC           |
| C-P48L2           | GCTTGATCAACAGCGCGGATACC           |
| C-M59K1           | GGTTCAACGAAGATCGCCACCG            |
| C-M59K2           | CGGTGGCGATCTTCGTTGAACC            |

|                 |                                                                    |
|-----------------|--------------------------------------------------------------------|
| C-V145E1        | CGGAAGGGGAACAGGTATCCAC                                             |
| C-V145E2        | GTGGATACCTGTTCCCTTCCG                                              |
| C-D211K1        | CTGACGCCGCCGAAAGTCTTCTCGCAAAC                                      |
| C-D211K2        | GTTTGCGAGAAGACTTTCGGCGGCGTCAG                                      |
| C-Q215K1        | GTCTTCTCGAAAACGCTGTTG                                              |
| C-Q215K2        | CAACAGCGTTTTTCGAGAAGAC                                             |
| TatB-L9QL10P-F  | GGTTTTAGCGAACAGCCATTGGTGTTCATC                                     |
| TatB-L9QL10P-R  | GATGAACACCAATGGCTGTTTCGCTAAAACC                                    |
| TatB-L10PF13Y-F | GCGAACTGCCATTGGTGTACATCATCGG                                       |
| TatB-L10PF13Y-R | CCGATGATGTACACCAATGGCAGTTCGC                                       |
| TatA-FB         | CAGAGGAGGATCCATGGG                                                 |
| TatB-RS         | GTATCGTCGACAGACATGC                                                |
| TatCR1d         | CTTGGGCTGCAGCCTTATTCTTC                                            |
| TatC93R         | TGCCACACCTGATAGAG                                                  |
| TatCm6          | CTTCCTCGAGTGATAAACCTTAAGCATG                                       |
| TatC95F         | ATCGCCCCAGCGCTGTAT                                                 |
| TatAup1-Xba I   | CGCTCTAGAGAAAACCTGCTCTACGTC                                        |
| TatAup2-ClaI    | GCGCATCGATAAGCTTGATATCGAAT                                         |
| TatA6B7-ClaI    | GCGCATCGATGATAAAGAGCAGGTGTAATCCGTGTTTGATATC<br>GGTTTTAGC           |
| TatCrev-KpnI    | CGGGGTACCTTATTCTTCAGTTTTTTTCGCTTTC                                 |
| TatANcol        | GCGCCCATGGGTGGTATCAGTATTTGG                                        |
| HisXba          | GCGCTCTAGATTAGTGATGGTGATGGTG                                       |
| STIPE-ISH       | GCGGATACGAATCAGGAACAG                                              |
| pT7.5R          | CGCTGAGATAGGTGCC.                                                  |
| p101C*BCflag_F  | GAAAGCGAAAAAACTGAAGAAGACTACAAGGACGATGACAAGT<br>AAGGCTGCAGGCATGCAAG |
| p101C*BCflag_R  | CTTGATGCCTGCAGCCTTACTTGTTCATCGTCCTTGATGCTTC<br>TTCAGTTTTTTTCGCTTTC |

**Table S5.** Oligonucleotides used in this study

## Supplementary References

1. Casadaban MJ, Cohen SN (1979) Lactose genes fused to exogenous promoters in one step using a Mu-lac bacteriophage: *in vivo* probe for transcriptional control sequences. *Proc Natl Acad Sci USA* 76(9):4530-4533.
2. Wexler M, *et al.* (2000) TatD is a cytoplasmic protein with DNase activity. No requirement for TatD family proteins in sec-independent protein export. *J Biol Chem* 275(22):16717-16722.
3. Lee PA, *et al.* (2006) Cysteine-scanning mutagenesis and disulfide mapping studies of the conserved domain of the twin-arginine translocase TatB component. *J Biol Chem* 281(45):34072-34085.
4. Alcock F, *et al.* (2013) Live cell imaging shows reversible assembly of the TatA component of the twin-arginine protein transport system. *Proc Natl Acad Sci USA* 110(38):E3650-3659.
5. Keller R, de Keyzer J, Driessen AJ, Palmer T (2012) Co-operation between different targeting pathways during integration of a membrane protein. *Journal Cell Biol* 199(2):303-315.
6. Datsenko KA, Wanner BL (2000) One-step inactivation of chromosomal genes in *Escherichia coli* K-12 using PCR products. *Proc Natl Acad Sci USA* 97(12):6640-6645.
7. Kneuper H, *et al.* (2012) Molecular dissection of TatC defines critical regions essential for protein transport and a TatB-TatC contact site. *Mol Microbiol* 85(5):945-961.
8. Hashimoto-Gotoh T, *et al.* (2000) A set of temperature sensitive-replication/-segregation and temperature resistant plasmid vectors with different copy numbers and in an isogenic background (chloramphenicol, kanamycin, *lacZ*, *repA*, *par*, *polA*). *Gene* 241(1):185-191.
9. Cléon F, *et al.* (2015) The TatC component of the twin-arginine protein translocase functions as an obligate oligomer. *Mol Microbiol* 98(1):111-129.
10. Maldonado B, *et al.* (2011) Characterisation of the membrane-extrinsic domain of the TatB component of the twin arginine protein translocase. *FEBS Lett* 585(3):478-484.
11. Jack RL, *et al.* (2004) Coordinating assembly and export of complex bacterial proteins. *EMBO J* 23(20):3962-3972.
12. Ize B, Stanley NR, Buchanan G, Palmer T (2003) Role of the *Escherichia coli* Tat pathway in outer membrane integrity. *Mol Microbiol* 48(5):1183-1193.
13. Tarry MJ, *et al.* (2009) Structural analysis of substrate binding by the TatBC component of the twin-arginine protein transport system. *Proc Natl Acad Sci USA* 106(32):13284-13289.
14. Hamilton CM, Aldea M, Washburn BK, Babitzke P, Kushner SR (1989) New method for generating deletions and gene replacements in *Escherichia coli*. *J Bacteriol* 171(9):4617-4622.

15. Guzman LM, Belin D, Carson MJ, Beckwith J (1995) Tight regulation, modulation, and high-level expression by vectors containing the arabinose  $P_{BAD}$  promoter. *J Bacteriol* 177(14):4121-4130.

## Supplementary Figure Legends

**Figure S1. Substitutions of the twin arginines in the AmiA signal peptide prevent growth in the presence of SDS.** Strain MCDSSAC  $\Delta$ *tatABC* producing wild type *tatABC* from plasmid pTAT1d and either wild type ('RR') or signal peptide point-substituted AmiA, as indicated, from pSUAmiA. The strain and plasmid combinations were cultured overnight in LB medium supplemented with chloramphenicol and ampicillin (for plasmid selection), after which they were streaked onto LB agar containing the same antibiotics, with and without the addition of 2% SDS and incubated for 16 hr at 37°C.

**Figure S2. TatB variants are able to restore Tat transport to a range of defective twin arginine substitutions in the AmiA signal sequence.** Growth of MCDSSAC  $\Delta$ *tatABC* coproducing the indicated TatB variants (with wild type *tatA* and *tatC*) from pTAT101, or the empty plasmid pTH19kr (indicated by ' $\Delta$ *tat*') alongside signal peptide variants of AmiA, on LB agar supplemented with chloramphenicol and kanamycin, with and without the addition of 2% SDS as indicated. An 8 $\mu$ l aliquot of each strain/plasmid combination following aerobic growth to an OD<sub>600</sub> of 1.0 was spotted and incubated for 16 hr at 37°C. A. Individual signal peptide substitutions of AmiA (indicated to the left of each panel) were tested against the TatB suppressors F6Y, L9P, L9Q, L10P, F13Y, K30I and I36N. B. The TatB E8K suppressor was tested for the ability to suppress the indicated AmiA signal peptide substitutions.

**Figure S3. TatB variants are able to restore Tat transport to a range of defective twin arginine substitutions in the SufI signal sequence.** Growth of MCDSSAC  $\Delta$ *tatABC* coproducing the indicated TatB variants (with wild type *tatA* and *tatC*) from pTAT101, or the empty plasmid pTH19kr (indicated by ' $\Delta$ *tat*') alongside signal peptide variants of SufI fused to the AmiA mature domain, on LB agar supplemented with chloramphenicol and kanamycin, with and without the addition of 2% SDS as indicated. An 8 $\mu$ l aliquot of each strain/plasmid combination following aerobic growth to an OD<sub>600</sub> of 1.0 was spotted and incubated for 16 hr at 37°C. A. Individual signal peptide substitutions of AmiA (indicated to the left of each panel) were tested against the TatB suppressors F6Y, L9P, L9Q, L10P, F13Y, K30I and I36N. B. The



TatB E8K suppressor was tested for the ability to suppress the indicated AmiA signal peptide substitutions

**Figure S4. A subset of amino acid substitutions at TatCF94 abolish Tat activity when produced at medium and low copy number.** A and C. Growth of DADE coproducing either wild type TatABC (Tat<sup>+</sup>), wild type TatAB alongside F94-substituted TatC or the cognate empty plasmid (Tat<sup>-</sup>) on LB agar containing 2% SDS. A single colony of each strain/plasmid combination was resuspended in 30μl of PBS and an 8μl aliquot was spotted onto LB agar supplemented with appropriate antibiotics, along with 2% SDS as indicated. Plates were incubated for 16 hr at 37°C. B and D. Detection of TatC protein present in membrane fractions of the same strain and plasmid combinations as in A. and C., respectively, by Western immunoblot with anti-TatC antiserum. A total of 5μg membranes was loaded per lane for TatC produced from pTAT1d (B) and 20μg per lane for membranes produced from strains harboring pTAT101 derivatives (D).

**Figure S5. TatB variants cannot suppress TatC inactivating substitutions outside of the signal peptide binding site.** Growth of DADE ( $\Delta$ *tatABCD*,  $\Delta$ *tatE*) coproducing wild type *TatA* alongside and the indicated substitution in *TatB* alongside either of *TatC* P48L, *TatC* M59K, *TatC* V145E, *TatC* D211K or *TatC* Q215K as indicated, from plasmid pTAT101 on LB agar or LB agar containing 2% SDS. A single colony of each strain/plasmid combination was resuspended in 30μl of PBS and an 8μl aliquot was spotted onto LB agar supplemented with appropriate antibiotics, along with 2% SDS as indicated, and incubated for 16 hr at 37°C.

**Figure S6. The suppressive effect of the TatB variants is not additive and mature AmiC is not exported in the presence of the TatB F13Y suppressor.** A. Growth of DADE coproducing either wild type TatABC (Tat<sup>+</sup>), wild type TatAB alongside F94-substituted TatC or the cognate empty plasmid (Tat<sup>-</sup>) on LB agar or LB agar containing 2% SDS. B. Growth of MCDSSAC  $\Delta$ *tatABC* coproducing the indicated *TatB* variants (with wild type *tatA* and *tatC*) from pTAT101, or the empty plasmid pTH19kr (indicated by ' $\Delta$ *tat*') alongside the RN or KK

signal peptide variants of SufI fused to the AmiA mature domain, as indicated, on LB agar with or without the addition of 2% SDS. C. Strain MC4100  $\Delta amiA \Delta amiC \Delta tatABC$  coproducing either wild-type TatB or TatB F13Y (with wild type *tatA* and *tatC*) from pTAT101 and the AmiA or AmiC mature domains (from pQE70-mAmiA or pQE70-mAmiC, respectively) on LB agar or LB agar containing 2% SDS. In each case a single colony of each strain/plasmid combination was resuspended in 30  $\mu$ l of PBS and an 8  $\mu$ l aliquot was spotted onto LB agar supplemented with appropriate antibiotics, along with 2% SDS where indicated. Plates were incubated for 16 hr at 37°C.

**Figure S7. The TatB suppressors support export of his-tagged SufI with its native signal peptide. A. and B.** *E. coli* strain DADE producing wild type TatA and TatC and the indicated TatB variants alongside wild-type SufI-his or the indicated signal-peptide variants were fractionated into whole cell (upper panels) and periplasm (lower panels) fractions, then analysed by Western blot with anti-6X His tag® or anti-RNA polymerase  $\beta$  subunit antibodies (cytoplasmic control protein). wc – whole cell.

**Figure S8. TatBC and SufI<sub>ss</sub>-GFP-His twin-arginine variants are detectable in whole cell samples.** A. and B. Cells producing SufI<sub>ss</sub>-GFP-His with the wild type (RR) or twin-arginine substituted SufI signal peptide, as indicated, alongside TatC and either wild type TatB or the E8K, F13Y or I36N substituted variants, or C. and D. Cells producing SufI<sub>ss</sub>-GFP-His with the wild type SufI signal peptide along with either wild type TatBC, the TatC F94Q allele along with either wild type TatB or the L9Q, L10P, F13Y or I36N substituted variants, or the TatC E103K allele along with either wild type TatB or the L9Q, L10P, F13Y or I36N substituted variants, as indicated were harvested and resuspended in PBS. A. and C. The fluorescence intensity and OD<sub>600</sub> of the samples were measured using a plate reader and the Fluorescence/OD<sub>600</sub> plotted for each sample. B. and D. 20  $\mu$ l of each cell suspension was taken, all samples were normalized to the same OD<sub>600</sub> and then analysed by SDS-PAGE followed by western blot using a TatB-TatC mixed antibody.

**Figure S9. TatBC complexes containing the TatB F13Y suppressor do not co-purify with signal peptide variants of AmiA.** C-terminally his-tagged wild type AmiA, twin-arginine substituted AmiA or signal sequence-less AmiA, as indicated was co-produced alongside wild type TatBC or TatBF13Y/TatC and purified using nickel beads from digitonin-treated cell extracts. Aliquots of the load and elution fractions were subject to SDS-PAGE followed by Western blot using either anti-His, anti-TatB and TatC antibodies.

**Figure S10. TatB variants are extracted from the membrane with digitonin.** Membrane suspensions (containing equivalent amounts of total protein) from strain DADE coproducing either wild type TatABC or wild type TatA and TatC alongside the indicated amino acid variant of TatB were solubilized by addition of 2% digitonin and incubation on ice for 30 min. Samples total membranes and digitonin solubilized material (each containing 10 $\mu$ g protein) were analysed by SDS-PAGE followed by western blotting with anti-TatA, anti-TatB or anti-TatC antibodies as indicated.

**Figure S11. Constitutive oligomerisation of TatA is not promoted by the TatB L9Q, L10P or I36N substitutions.** Fluorescence images of TatA-YFP in representative cells of A. strains AyBCE or AyBC<sub>F94Q</sub>E (encoding chromosomal TatC F94Q) in the presence (pAmiA) or absence of plasmid-encoded wild type AmiA, as indicated (reproduced from Fig 5A). B. strains AyB<sub>L9Q</sub>CE (encoding chromosomal TatB L9Q), AyB<sub>L10P</sub>CE (encoding chromosomal TatB L10P) and AyB<sub>I36N</sub>CE (encoding chromosomal TatB I36N) or the same strains additionally harboring the chromosomally-encoded TatC F94Q substitution. Scale bar: 1  $\mu$ m. Note that the pictures in panel A are identical to those in Fig 5A and were included here to provide a direct comparison with panel B.

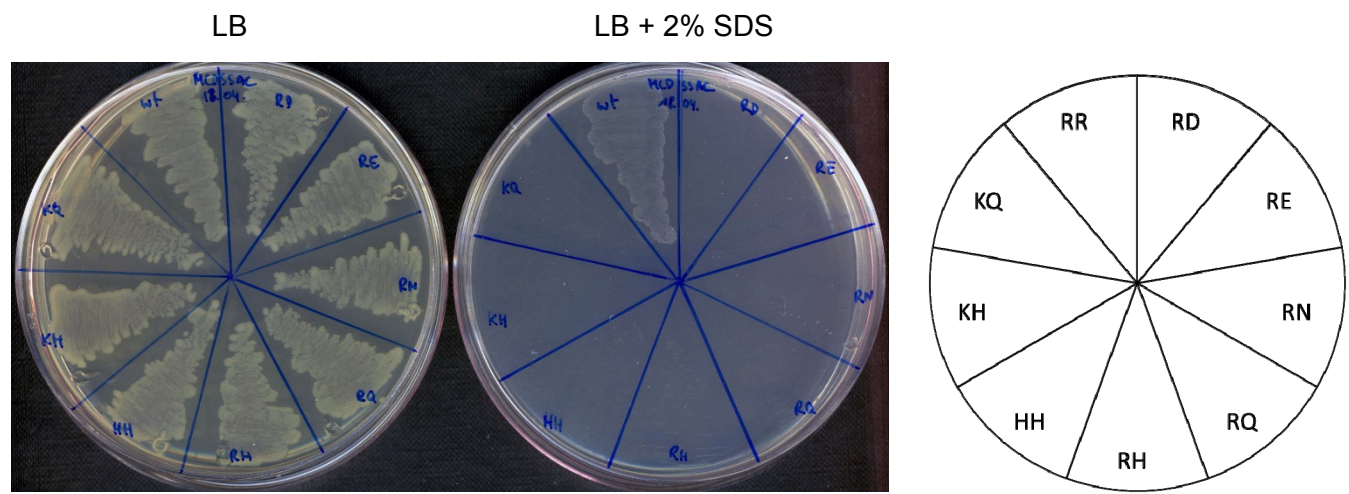

Fig S1

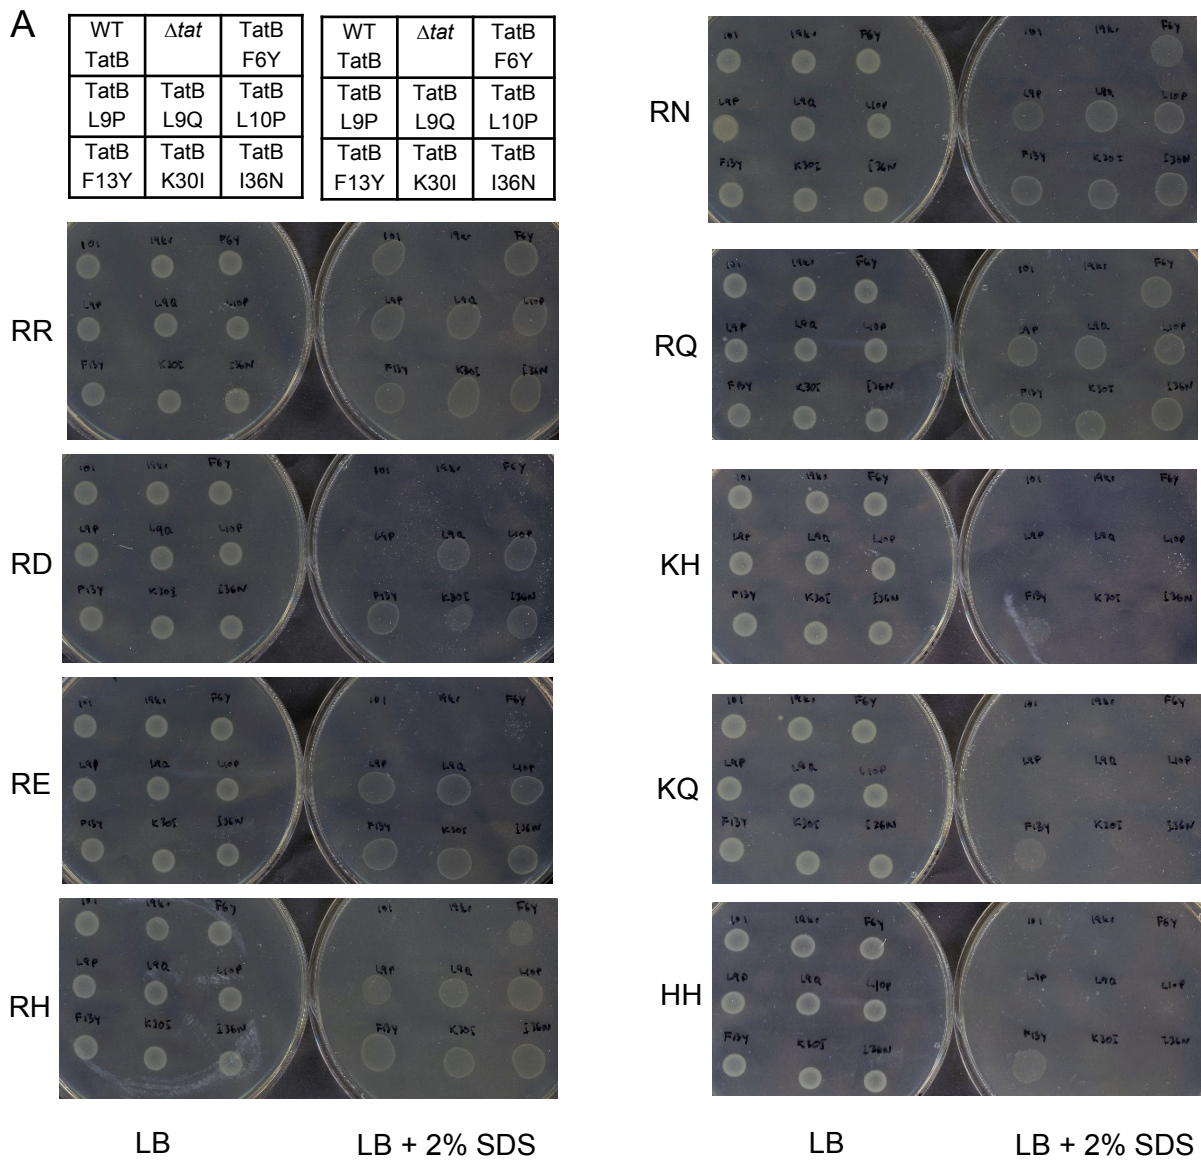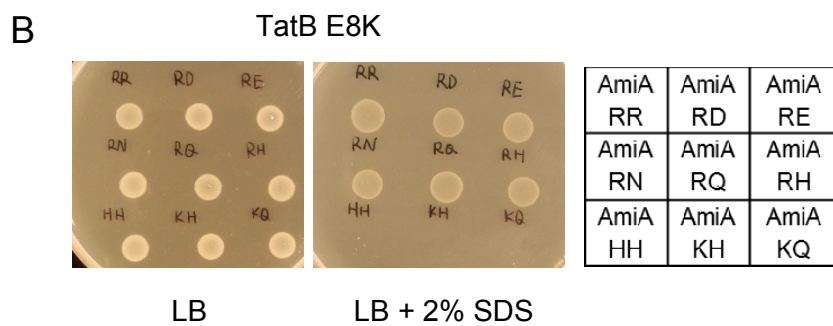

Fig S2

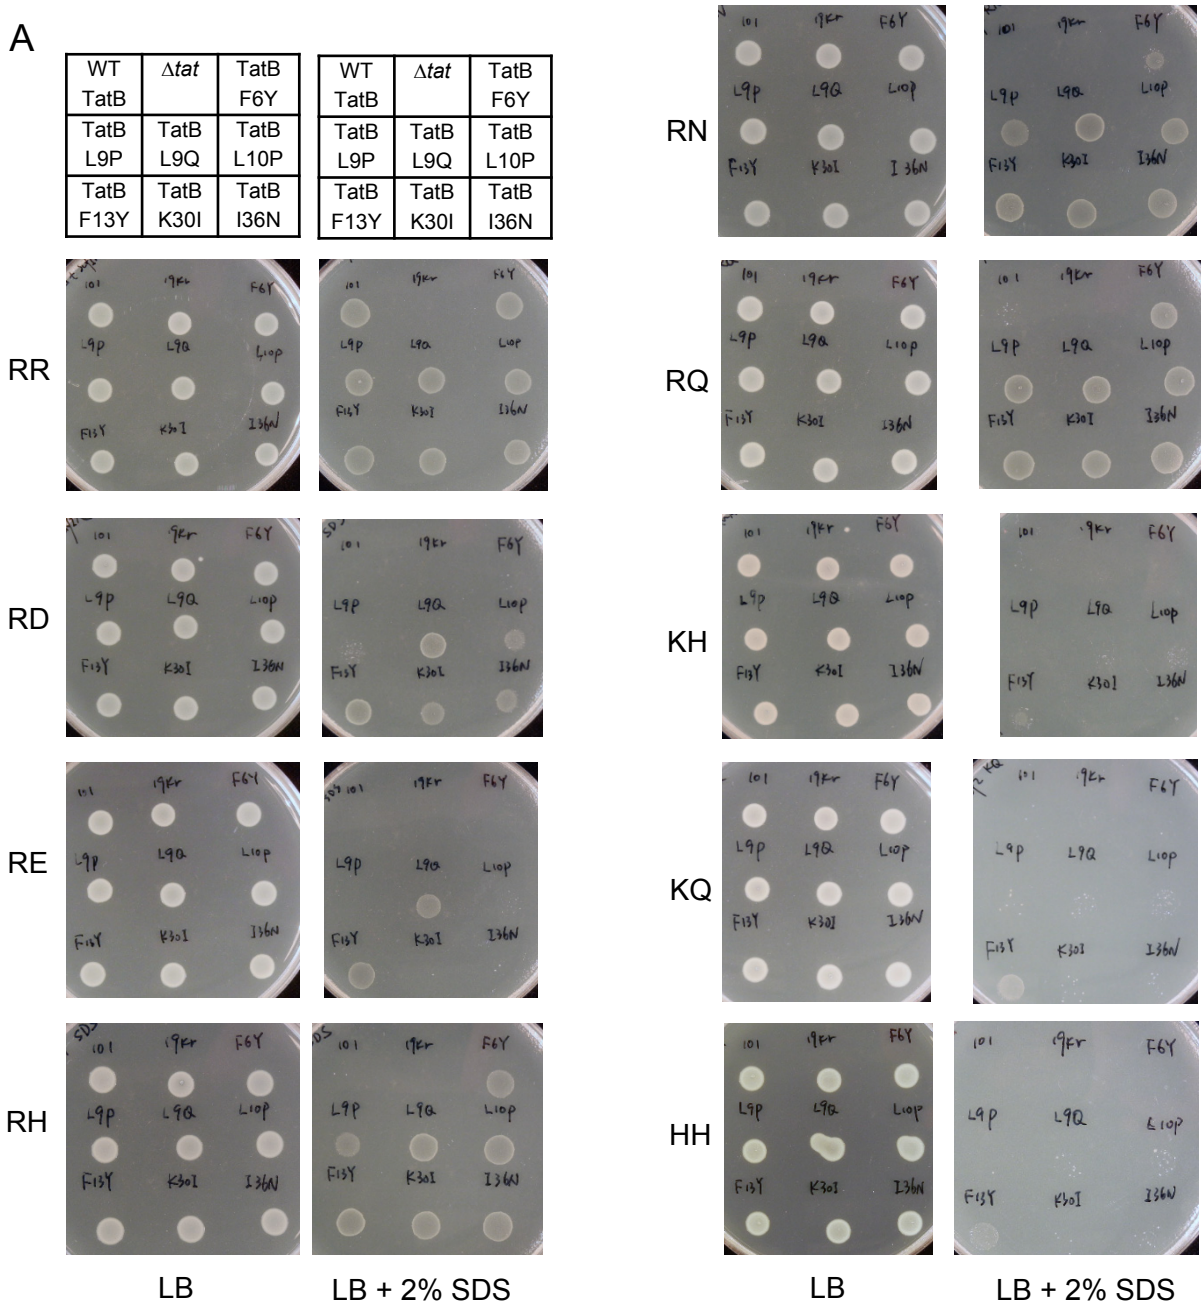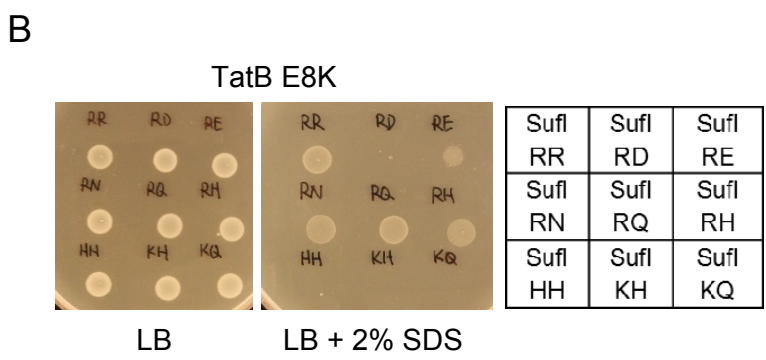

Fig S3



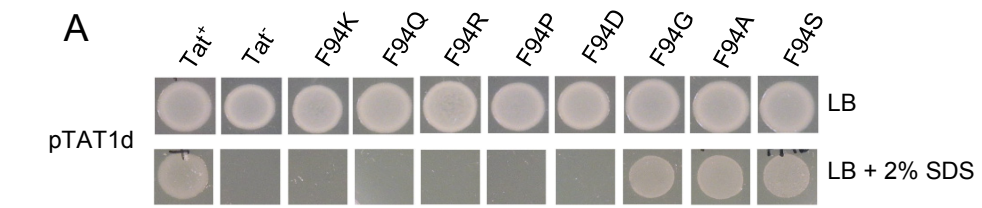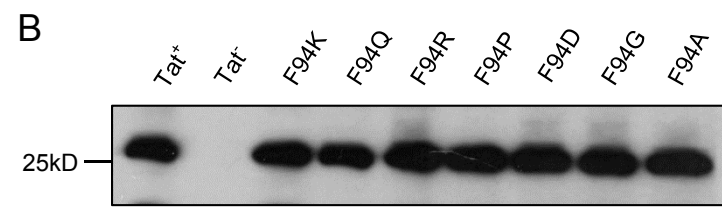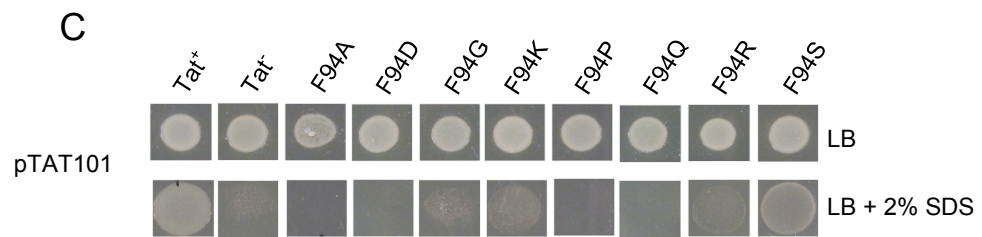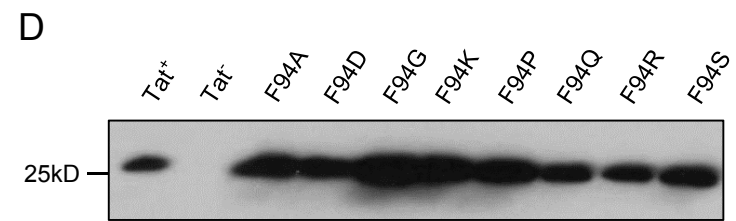

Fig S4

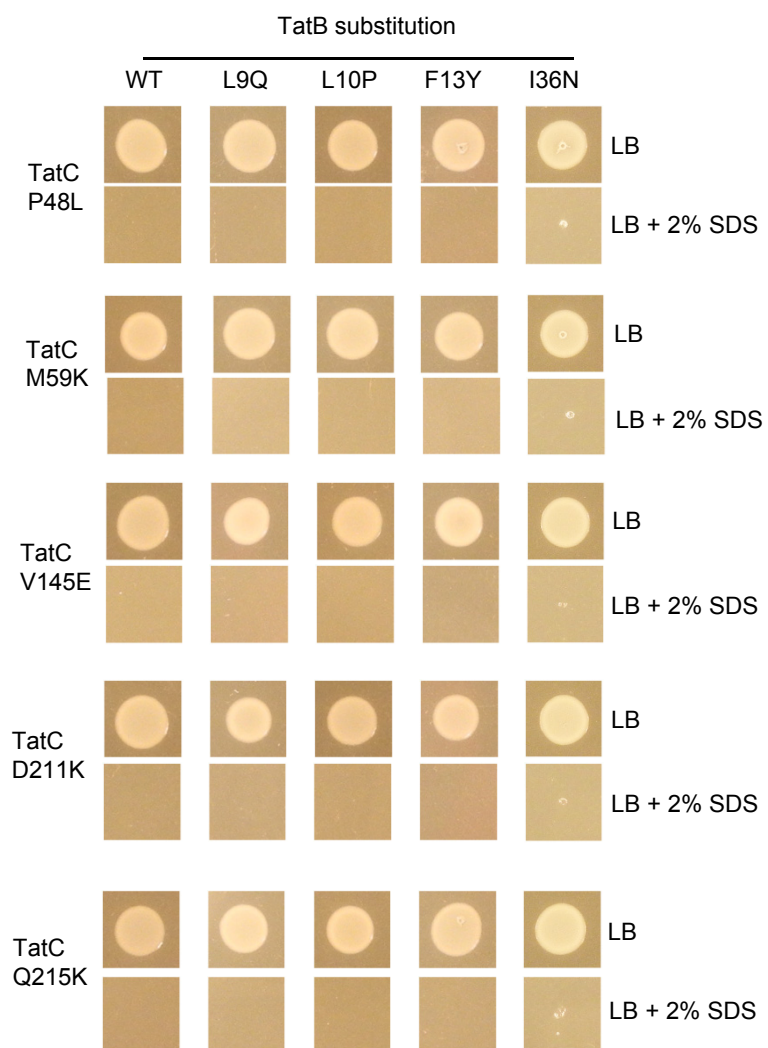

Fig S5



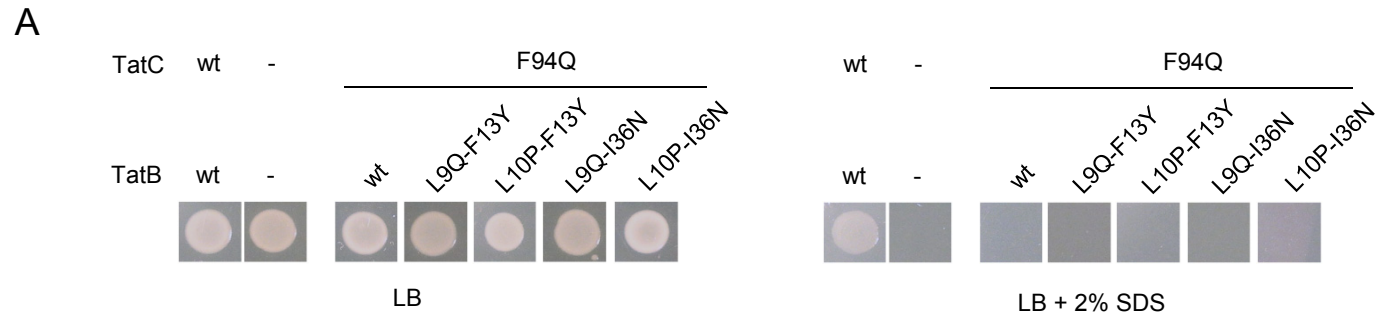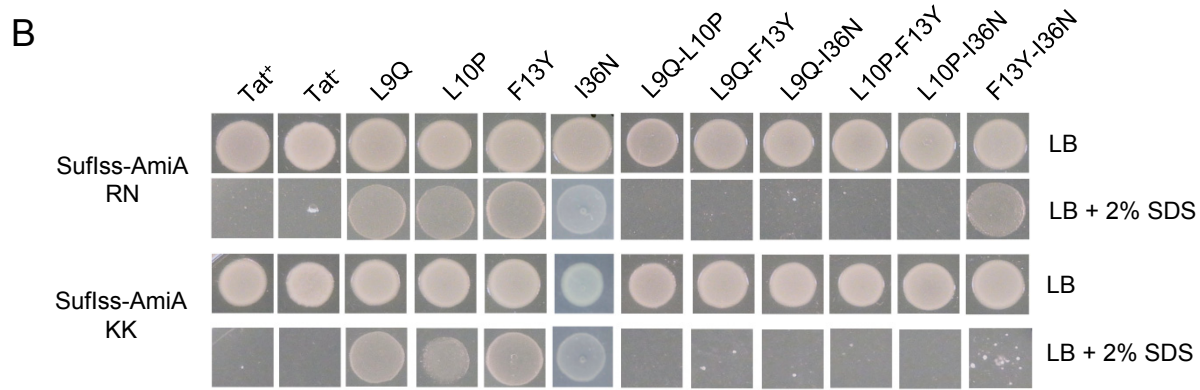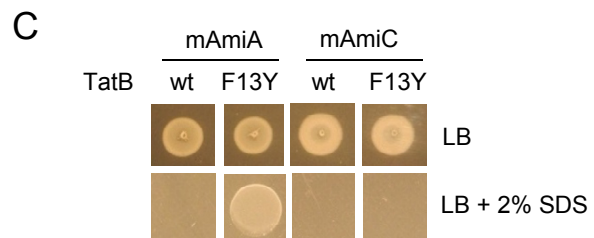

Fig S6

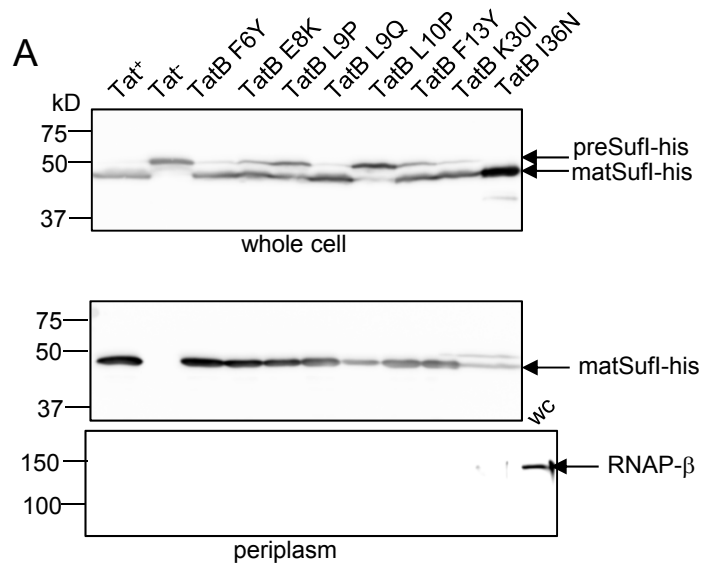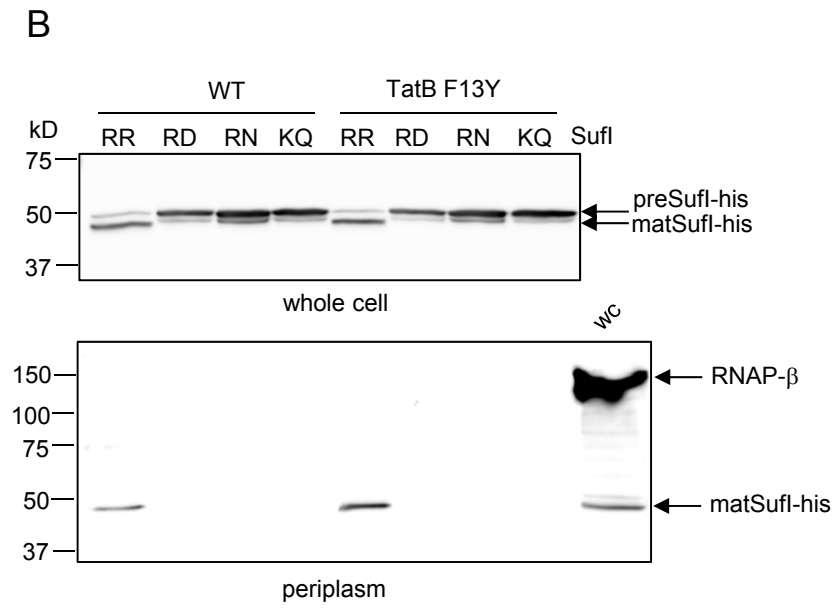

Fig S7

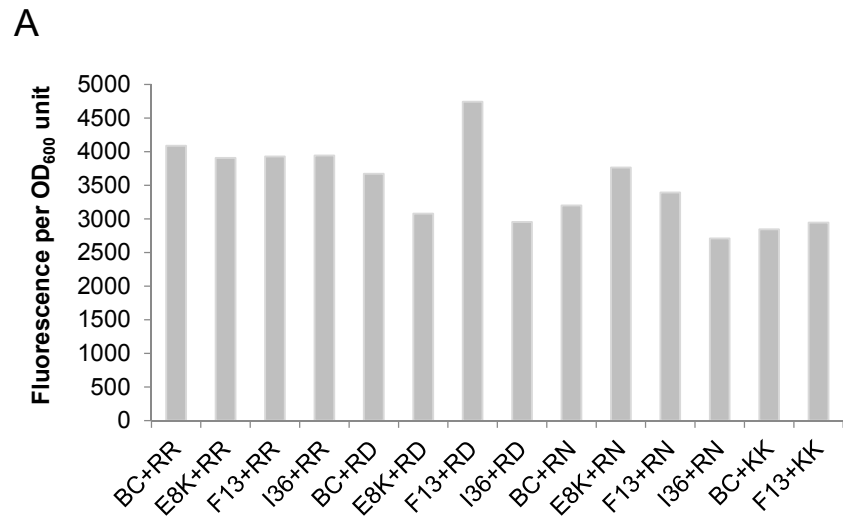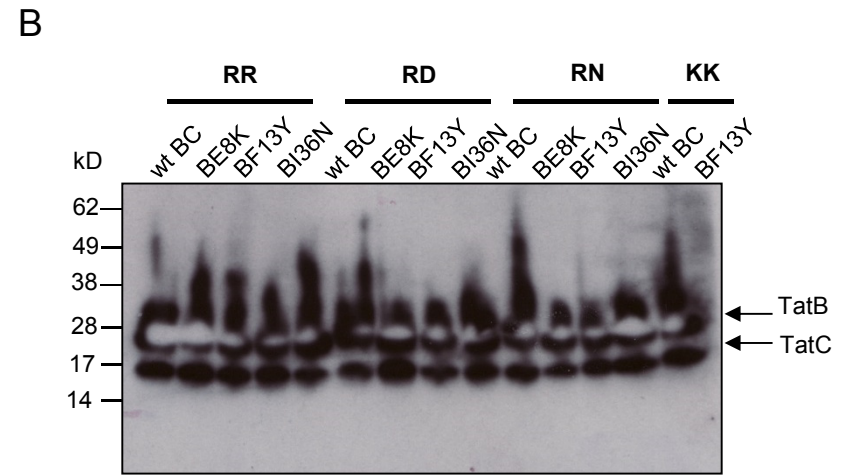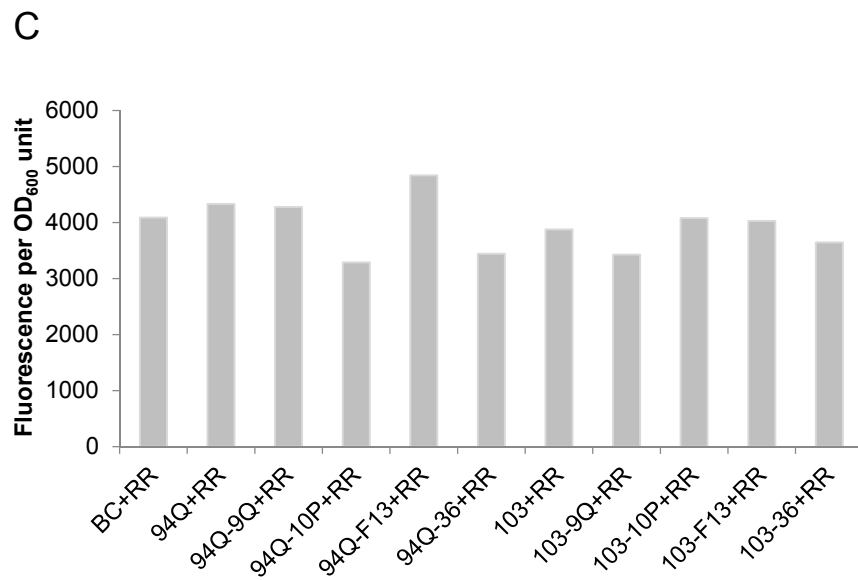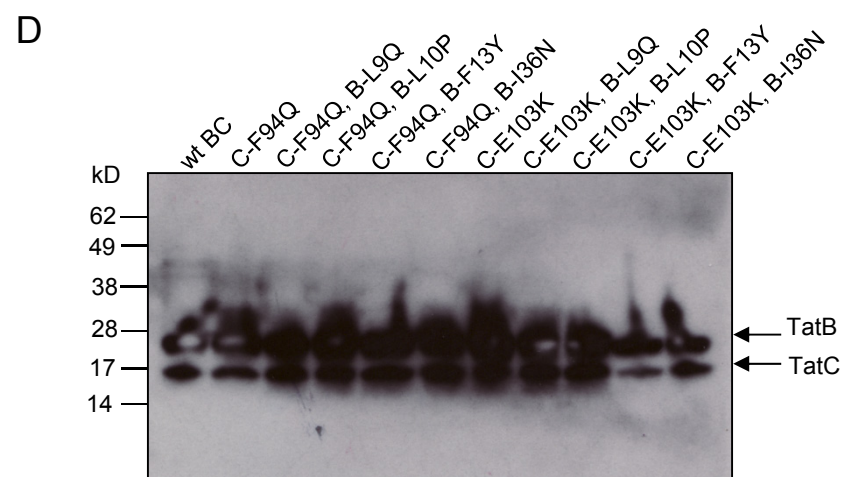

Fig S8

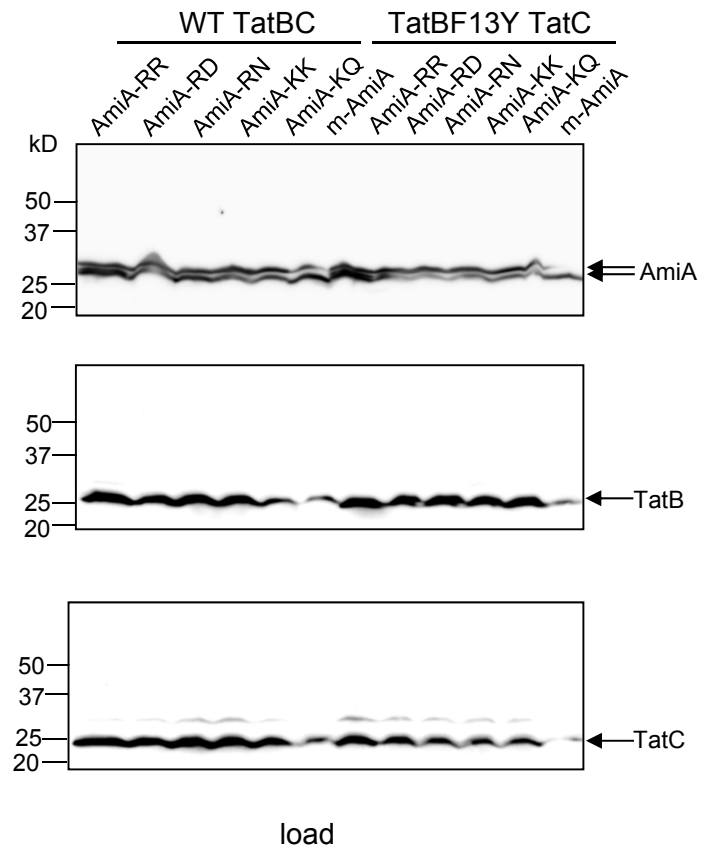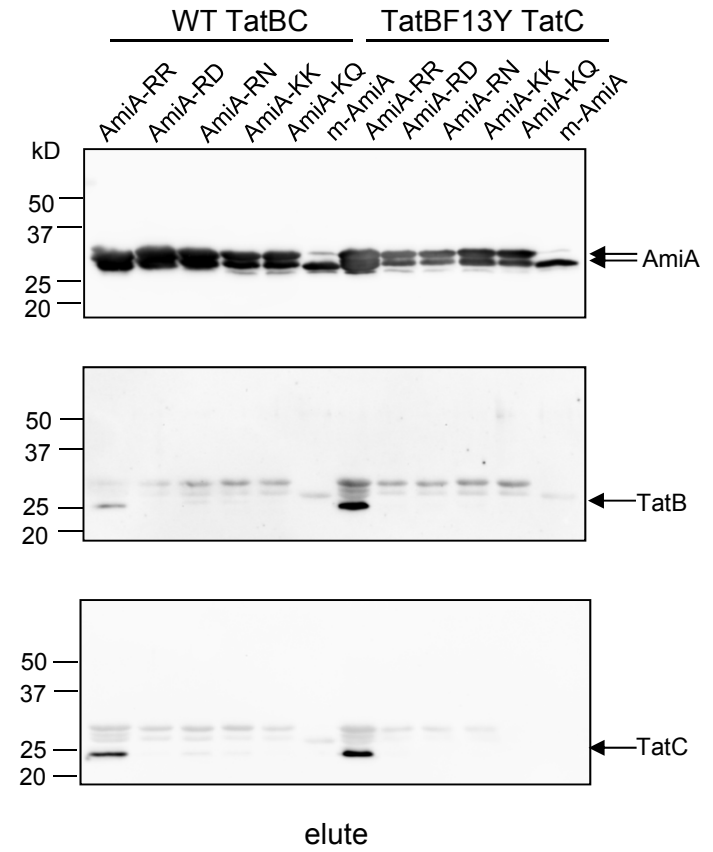

Fig S9

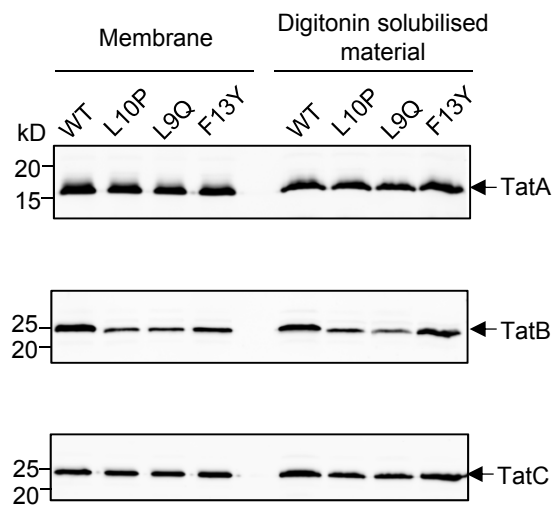

Fig S10

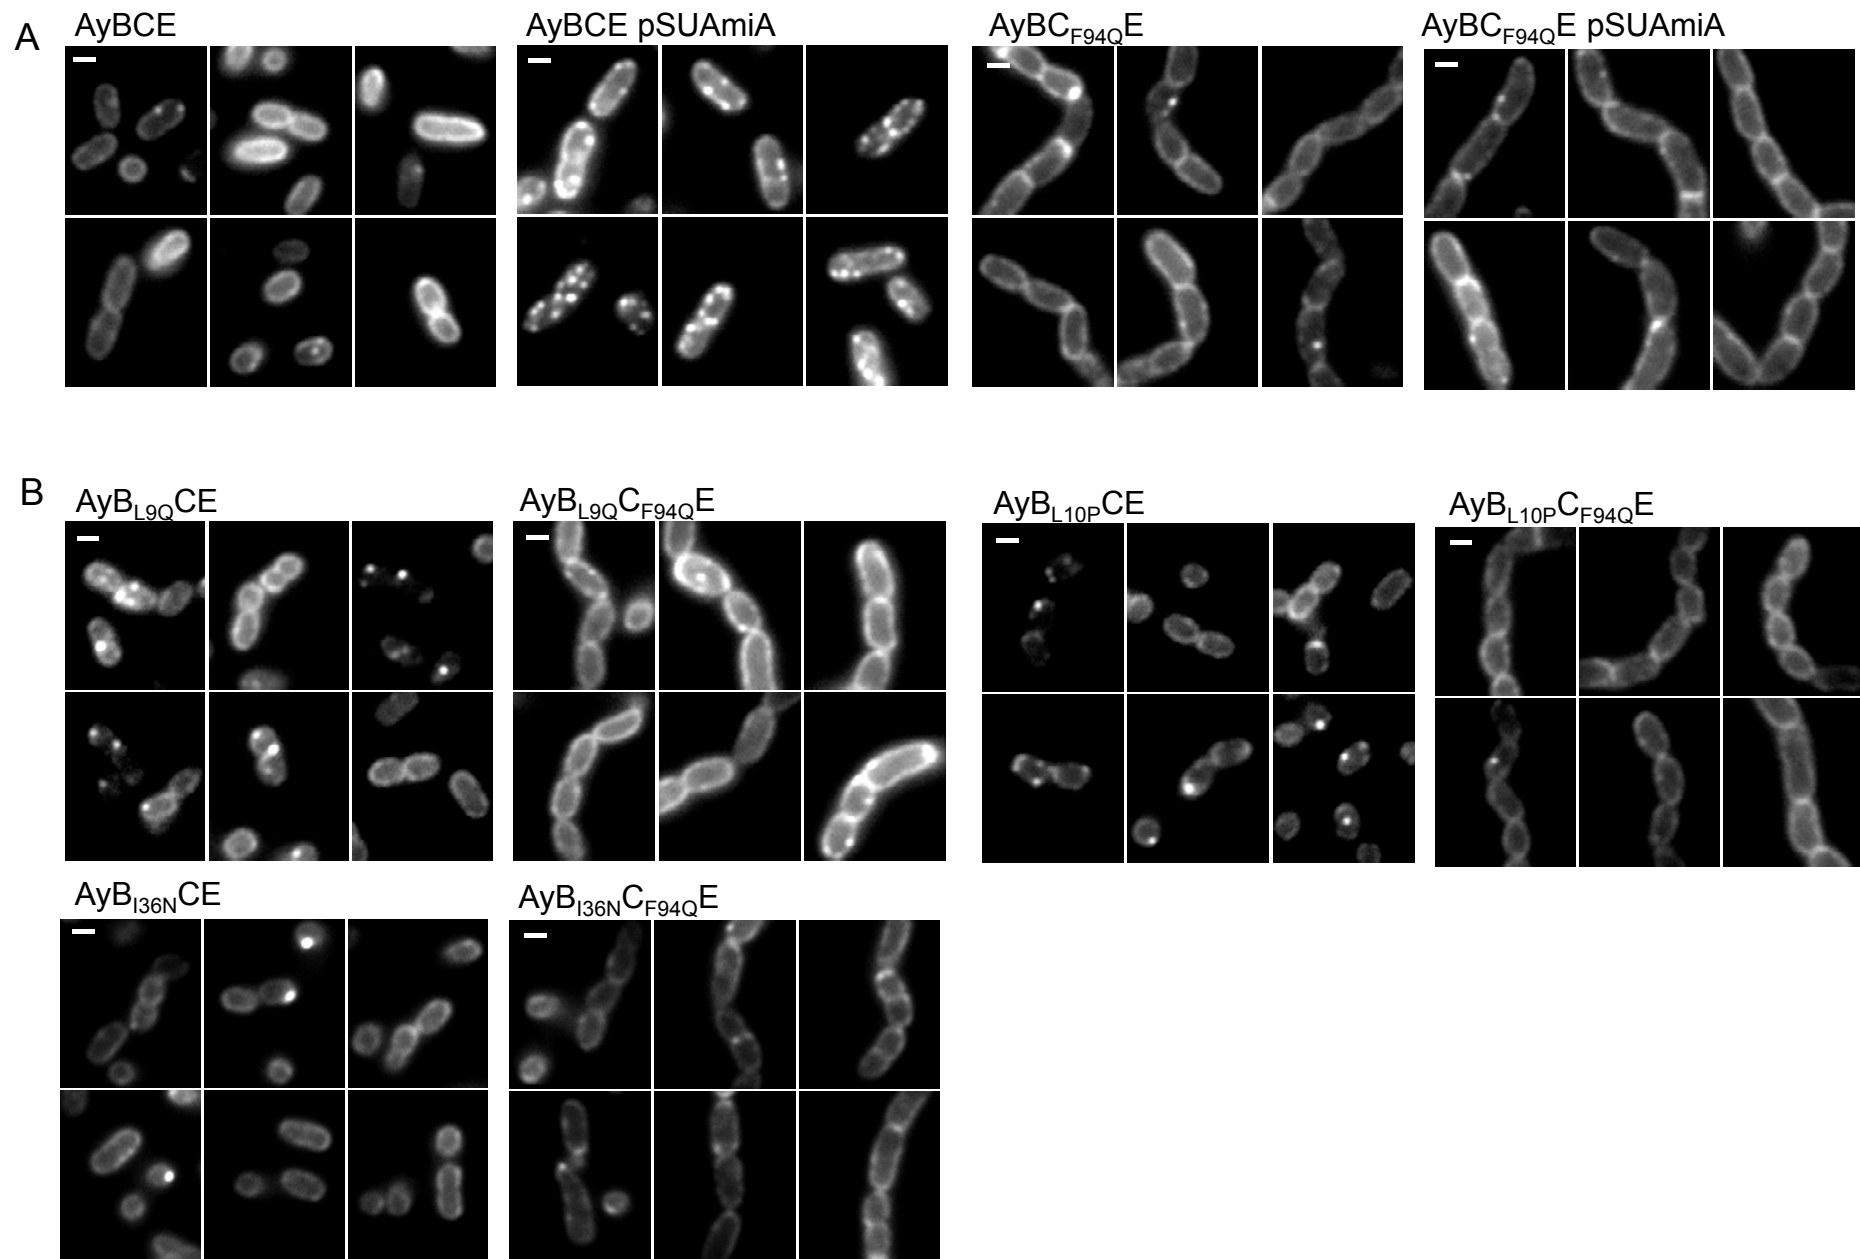

Fig S11
